# Supplementary material for: Gating and selectivity mechanisms for the lysosomal K+ channel TMEM175
Source: eLife journal article supplement (doi:10.7554/elife.53430), 2020-03-31
Supplement: supp [file elife-53430-supp-v1.zip]

Archive with 11 entries (11 files):
- elife_poa_e53430_Figure_2_figure_supplement_4.png
- elife_poa_e53430_Video_1.avi
- elife_poa_e53430_Figure_3_figure_supplement_1.png
- elife_poa_e53430_Figure_2_figure_supplement_3.png
- elife_poa_e53430_Figure_3_figure_supplement_3.png
- elife_poa_e53430_Figure_4_figure_supplement_1.png
- elife_poa_e53430_Figure_2_figure_supplement_2.png
- elife_poa_e53430_Figure_1_figure_supplement_1.png
- elife_poa_e53430_Transparent_Reporting_File.pdf
- elife_poa_e53430_Figure_2_figure_supplement_1.png
- elife_poa_e53430_Figure_6_figure_supplement_1.png
