# Supplementary figures and images for: Gating and selectivity mechanisms for the lysosomal K+ channel TMEM175
Source: eLife journal article supplement (doi:10.7554/elife.53430), 2020-03-31

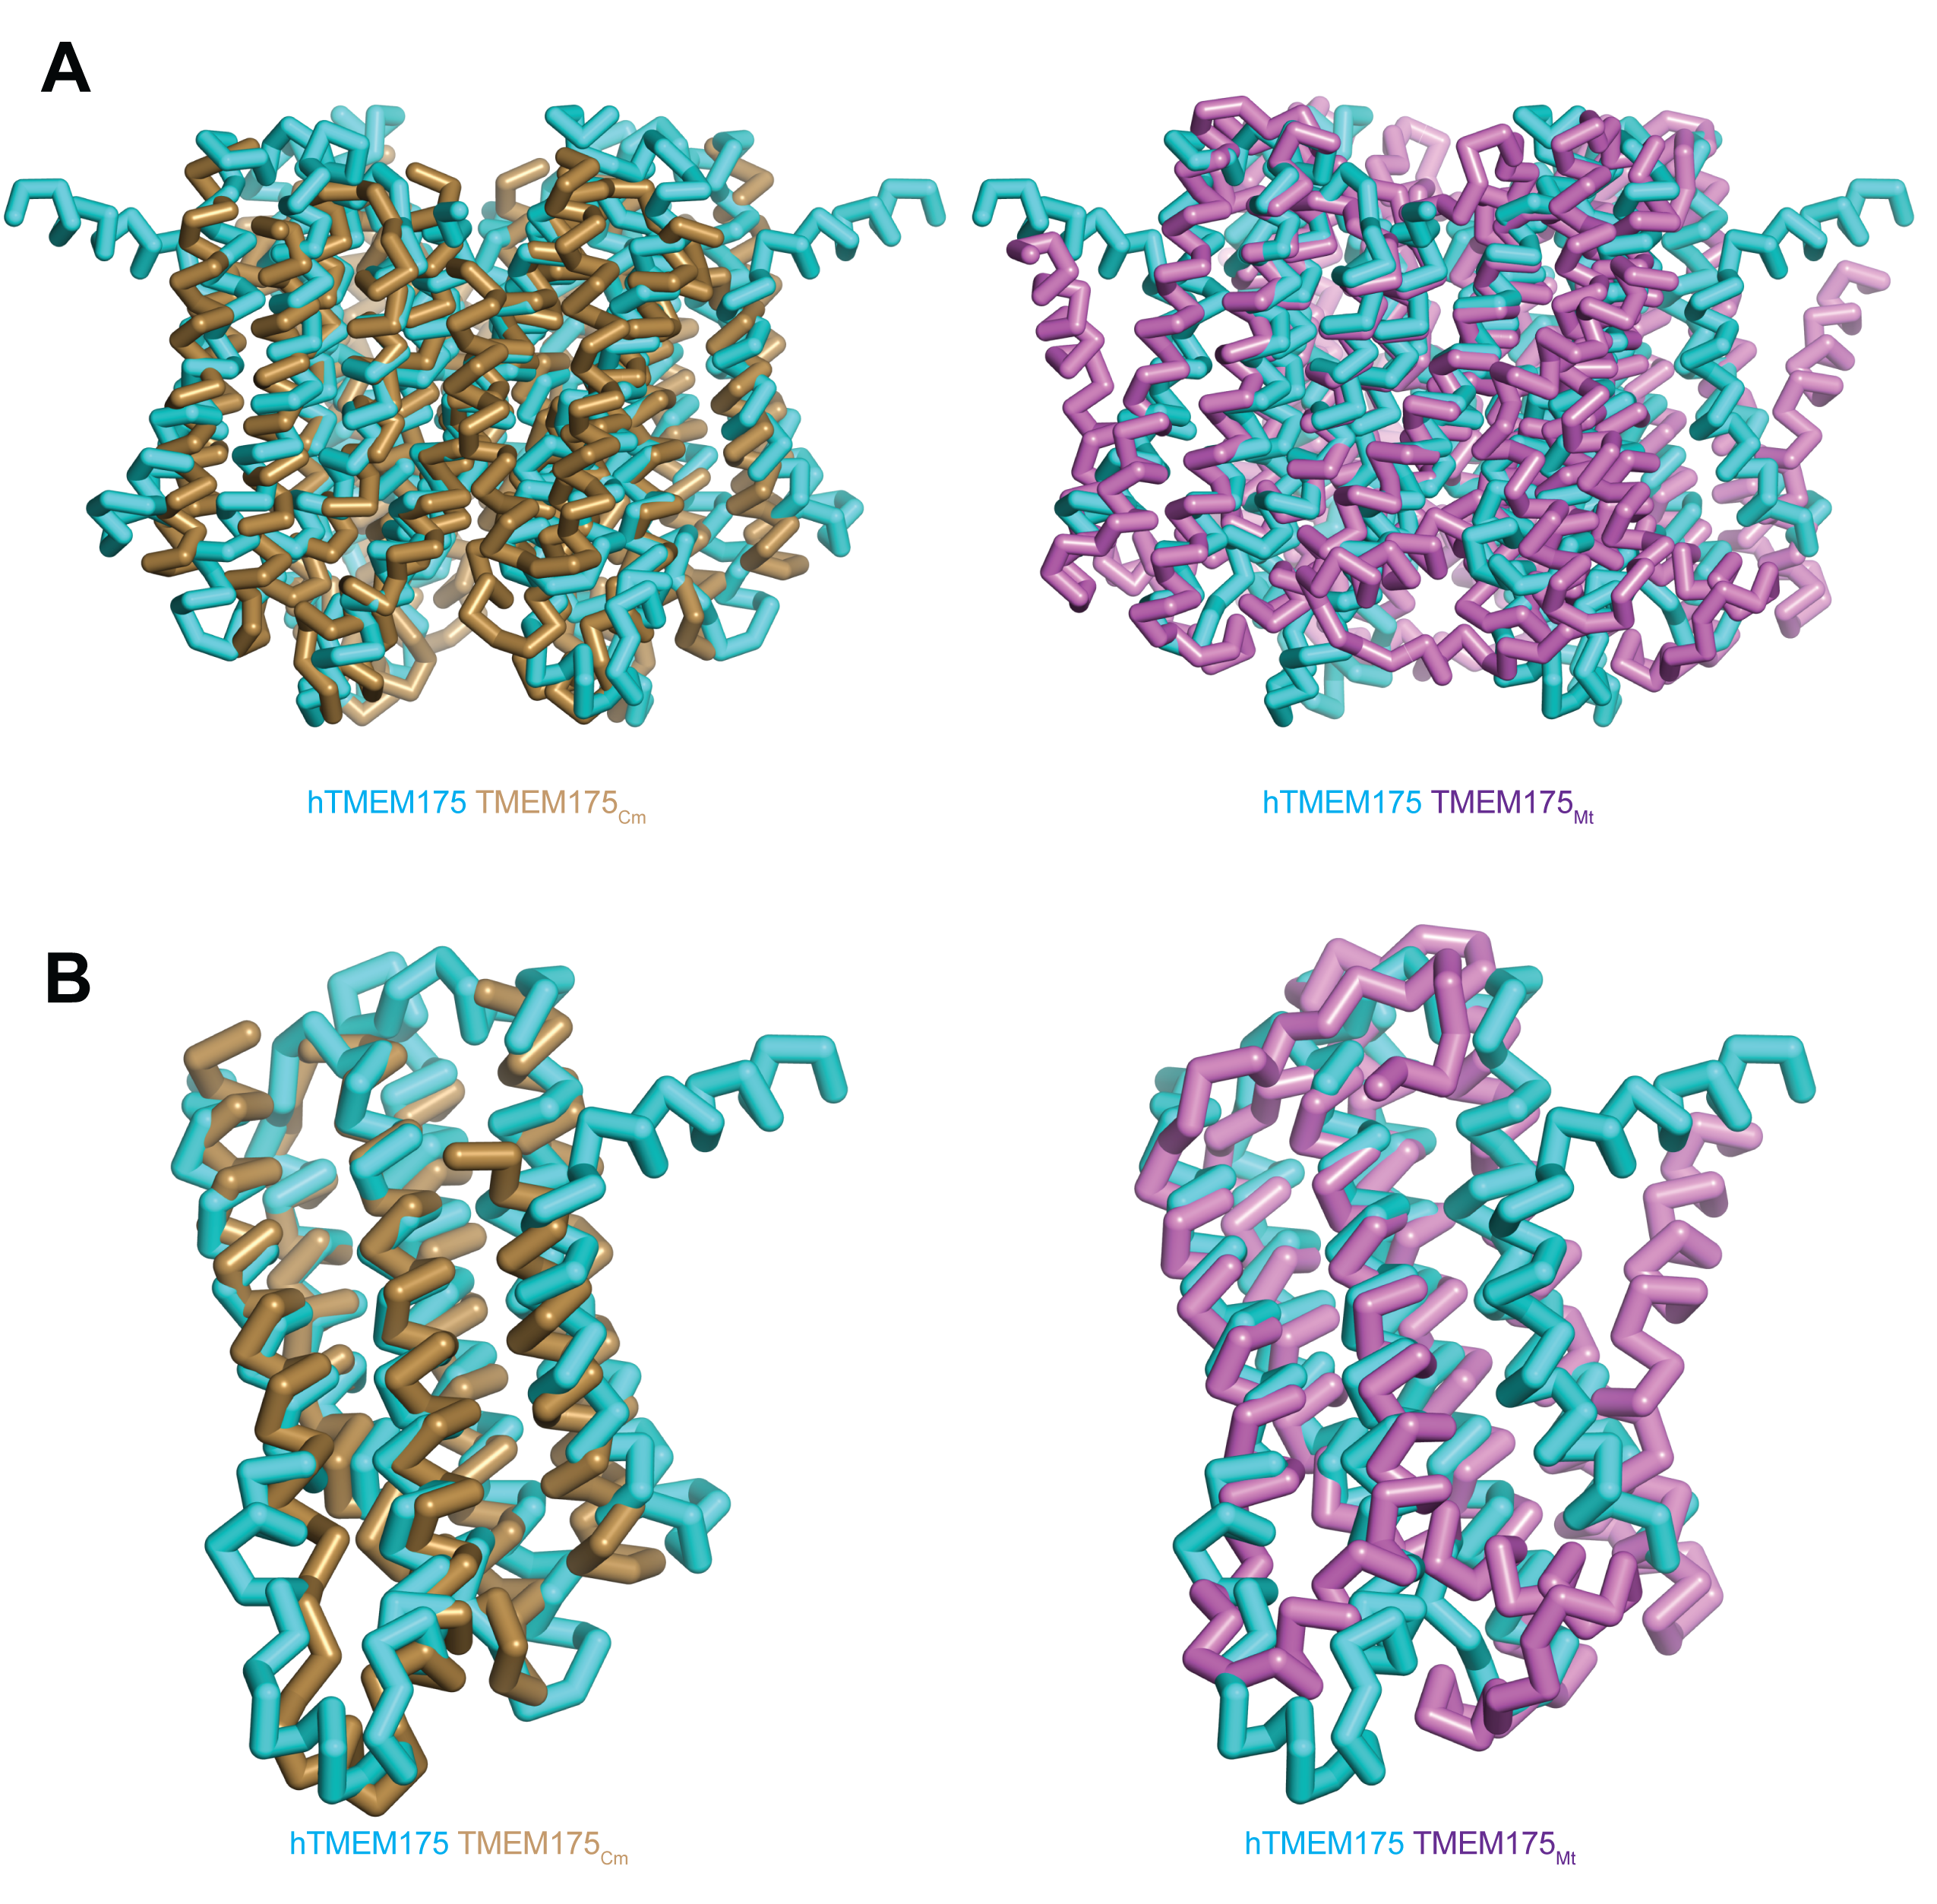

Supplement: supp [file elife-53430-supp-v1.zip › elife_poa_e53430_Figure_2_figure_supplement_4.png]

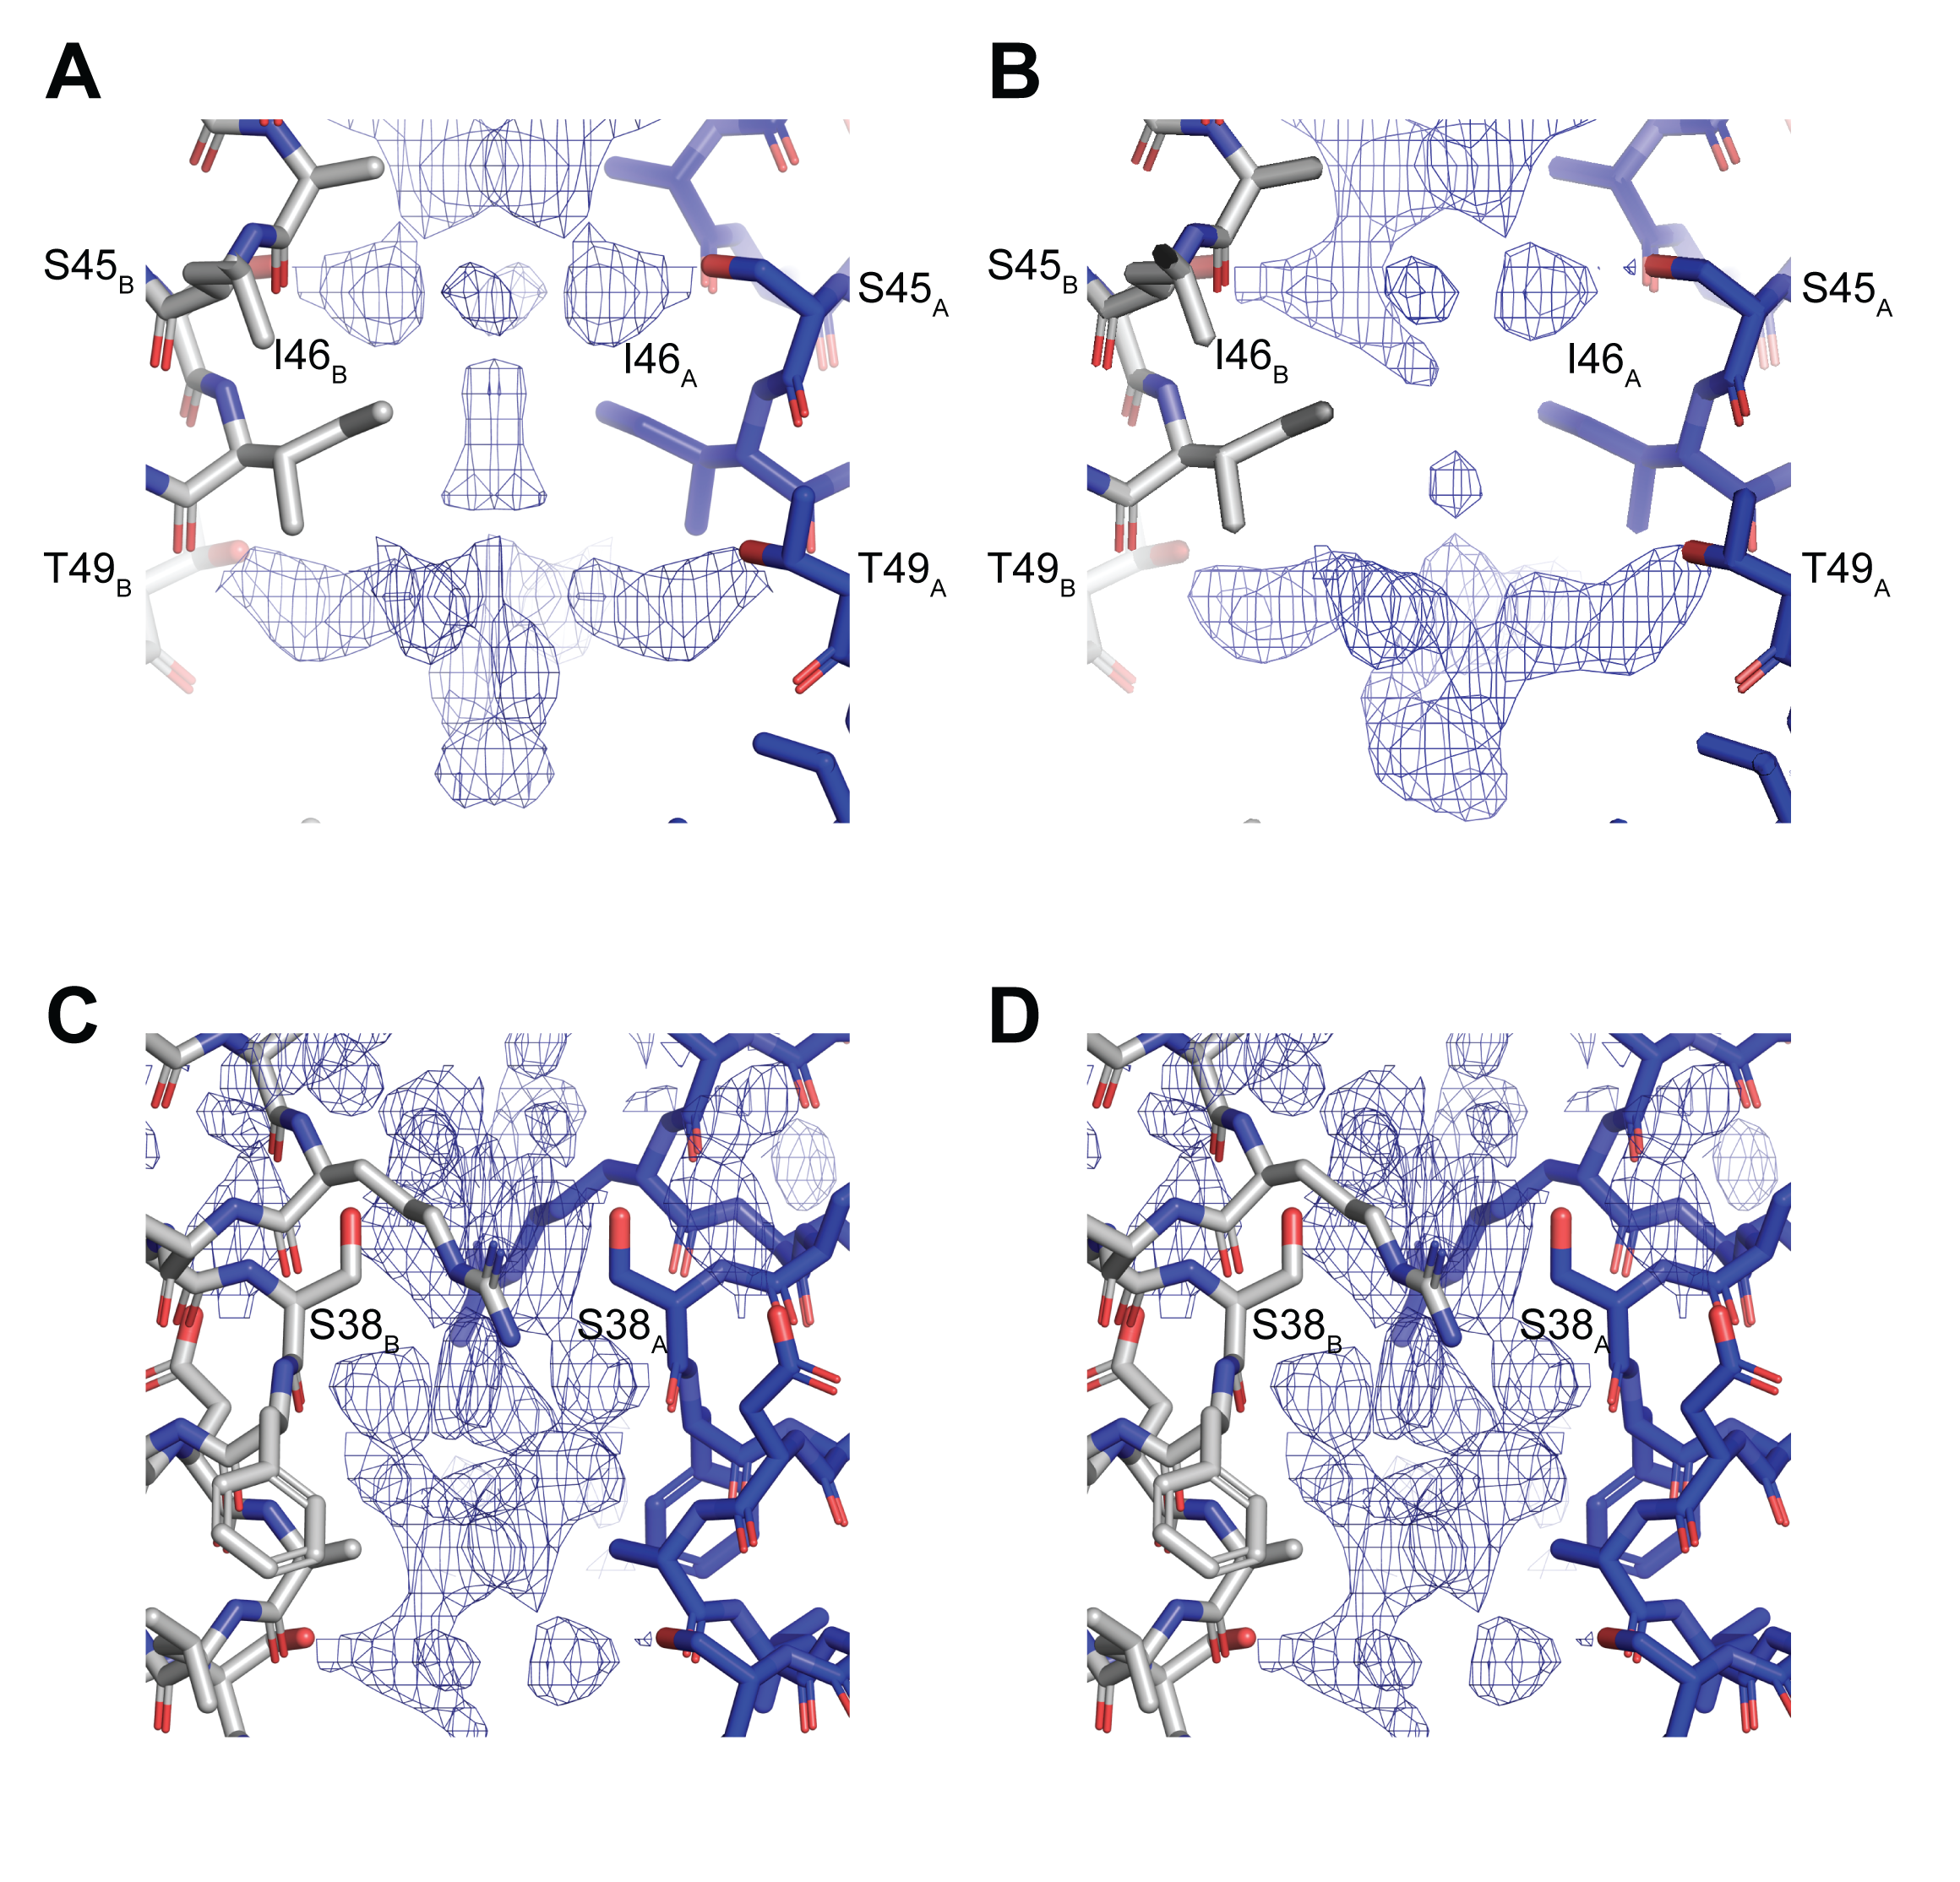

Supplement: supp [file elife-53430-supp-v1.zip › elife_poa_e53430_Figure_3_figure_supplement_1.png]

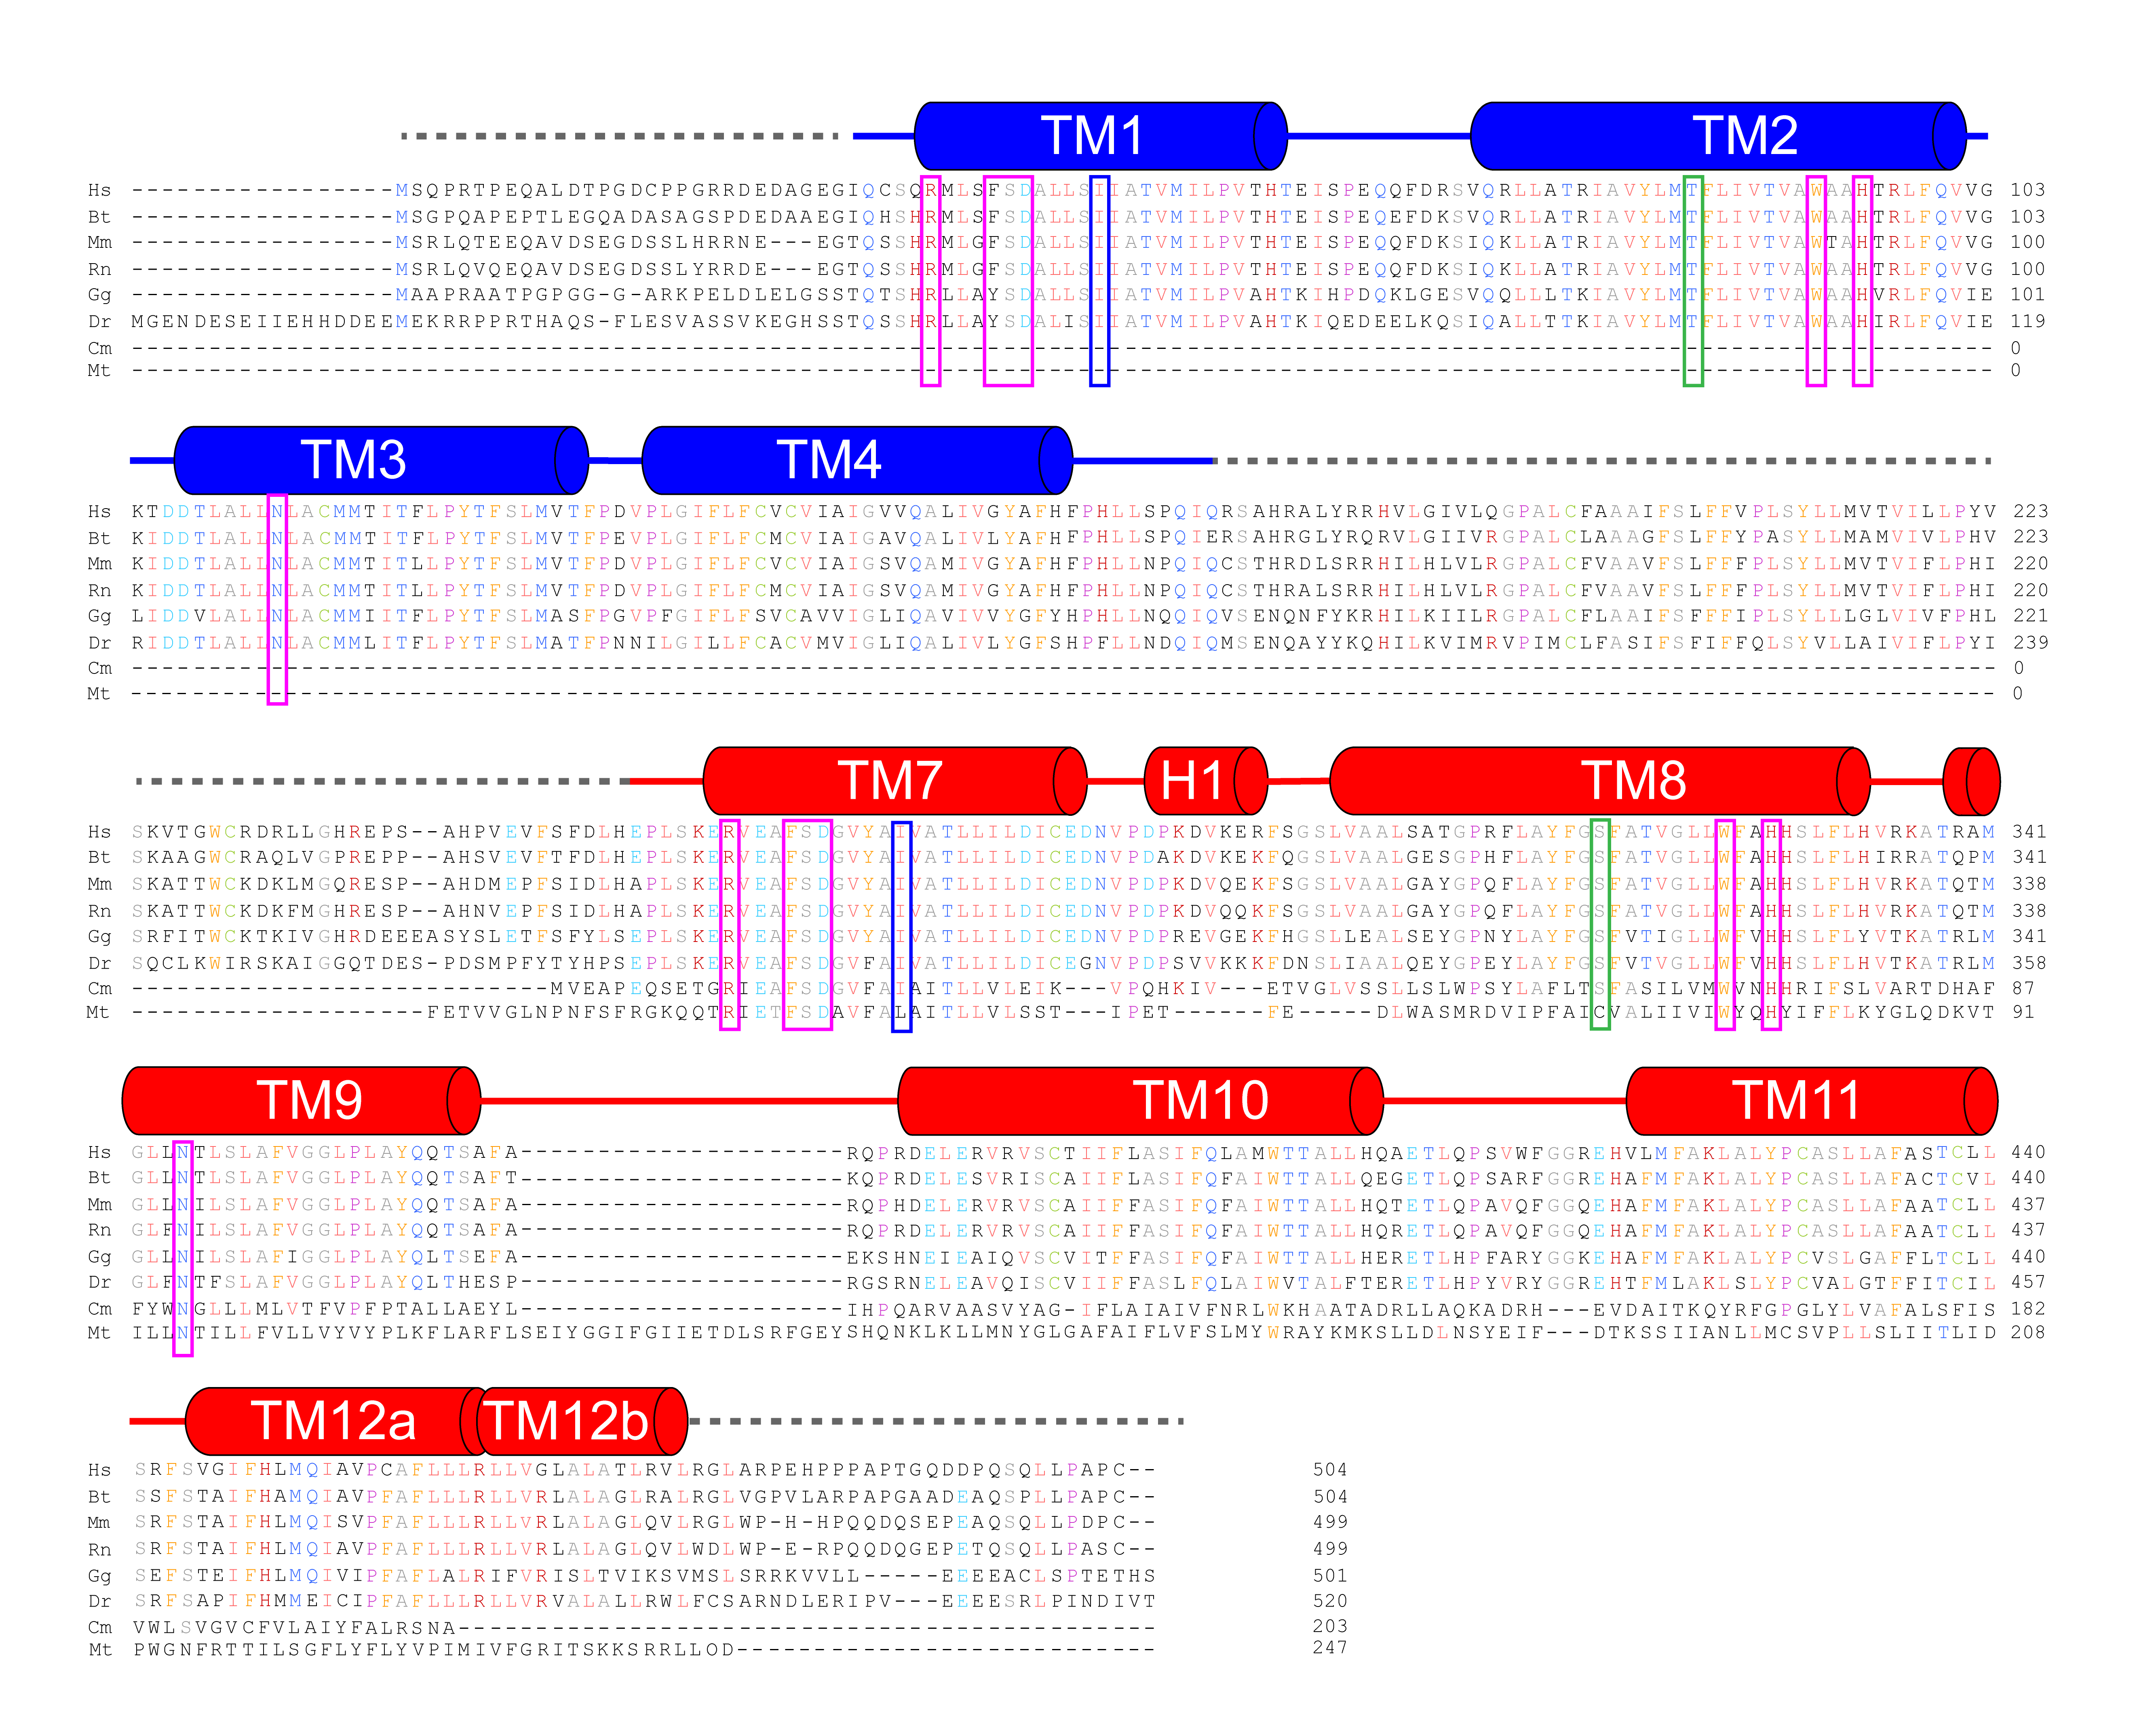

Supplement: supp [file elife-53430-supp-v1.zip › elife_poa_e53430_Figure_2_figure_supplement_3.png]

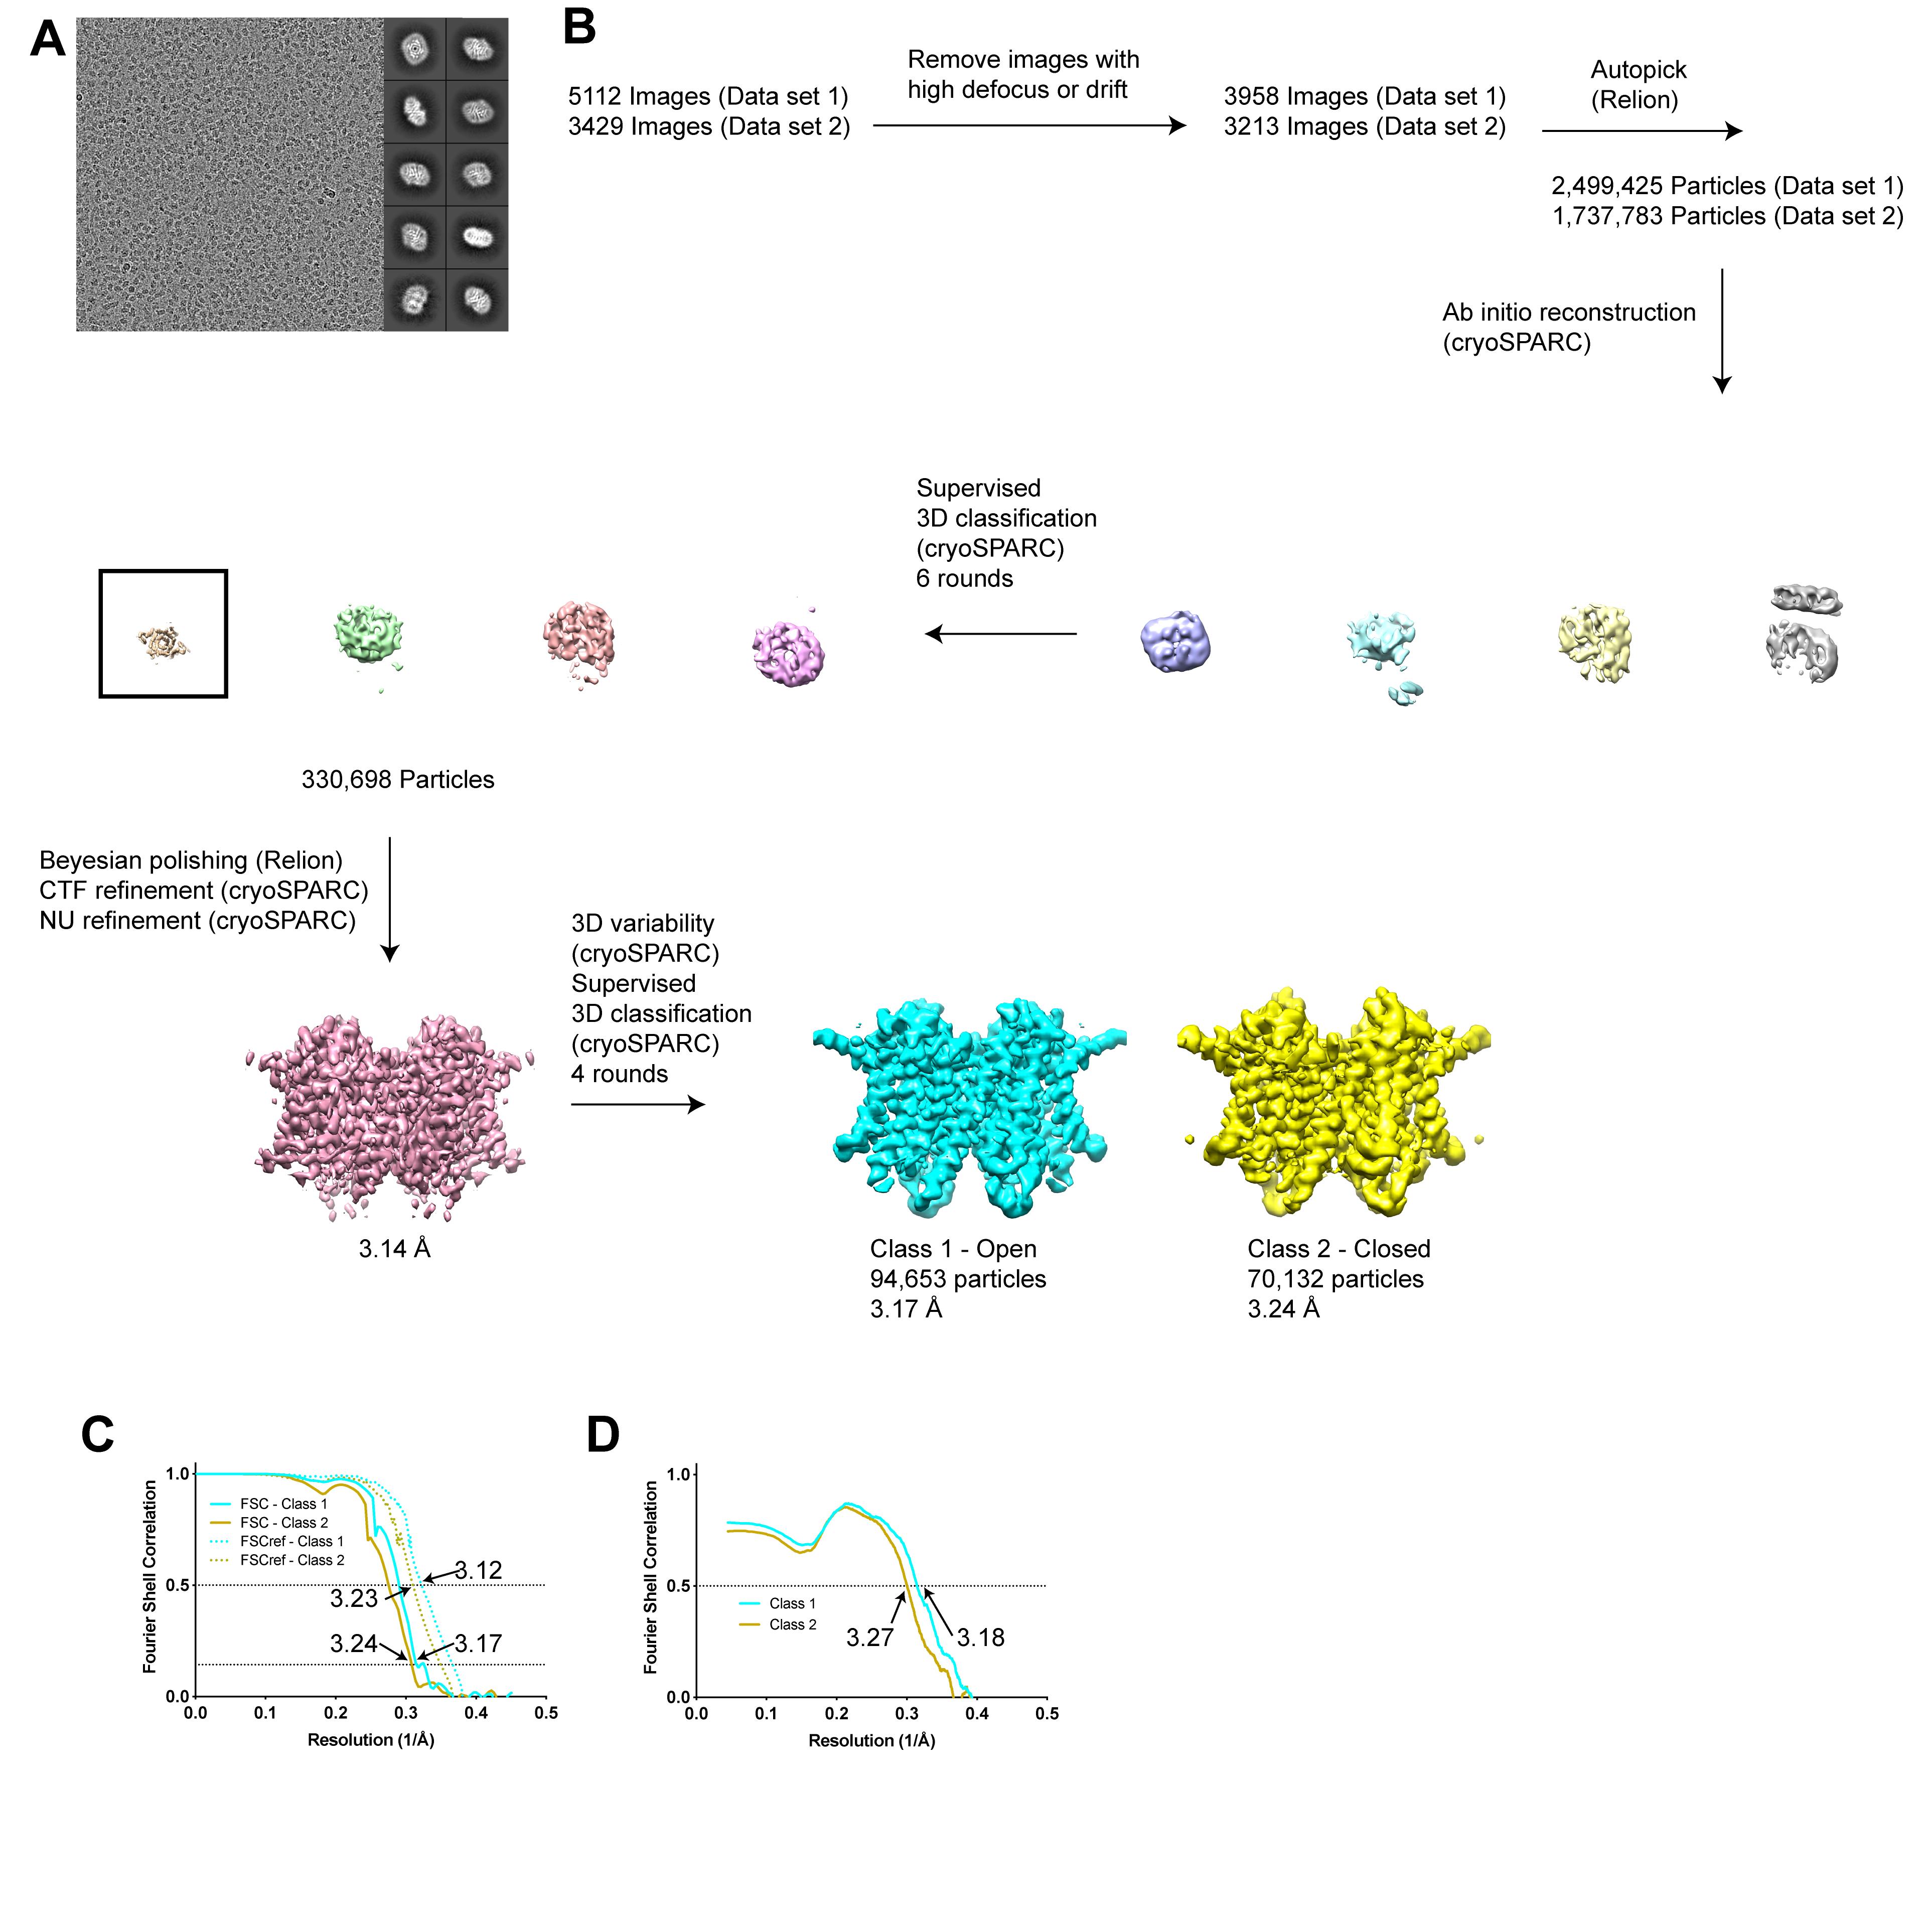

Supplement: supp [file elife-53430-supp-v1.zip › elife_poa_e53430_Figure_3_figure_supplement_3.png]

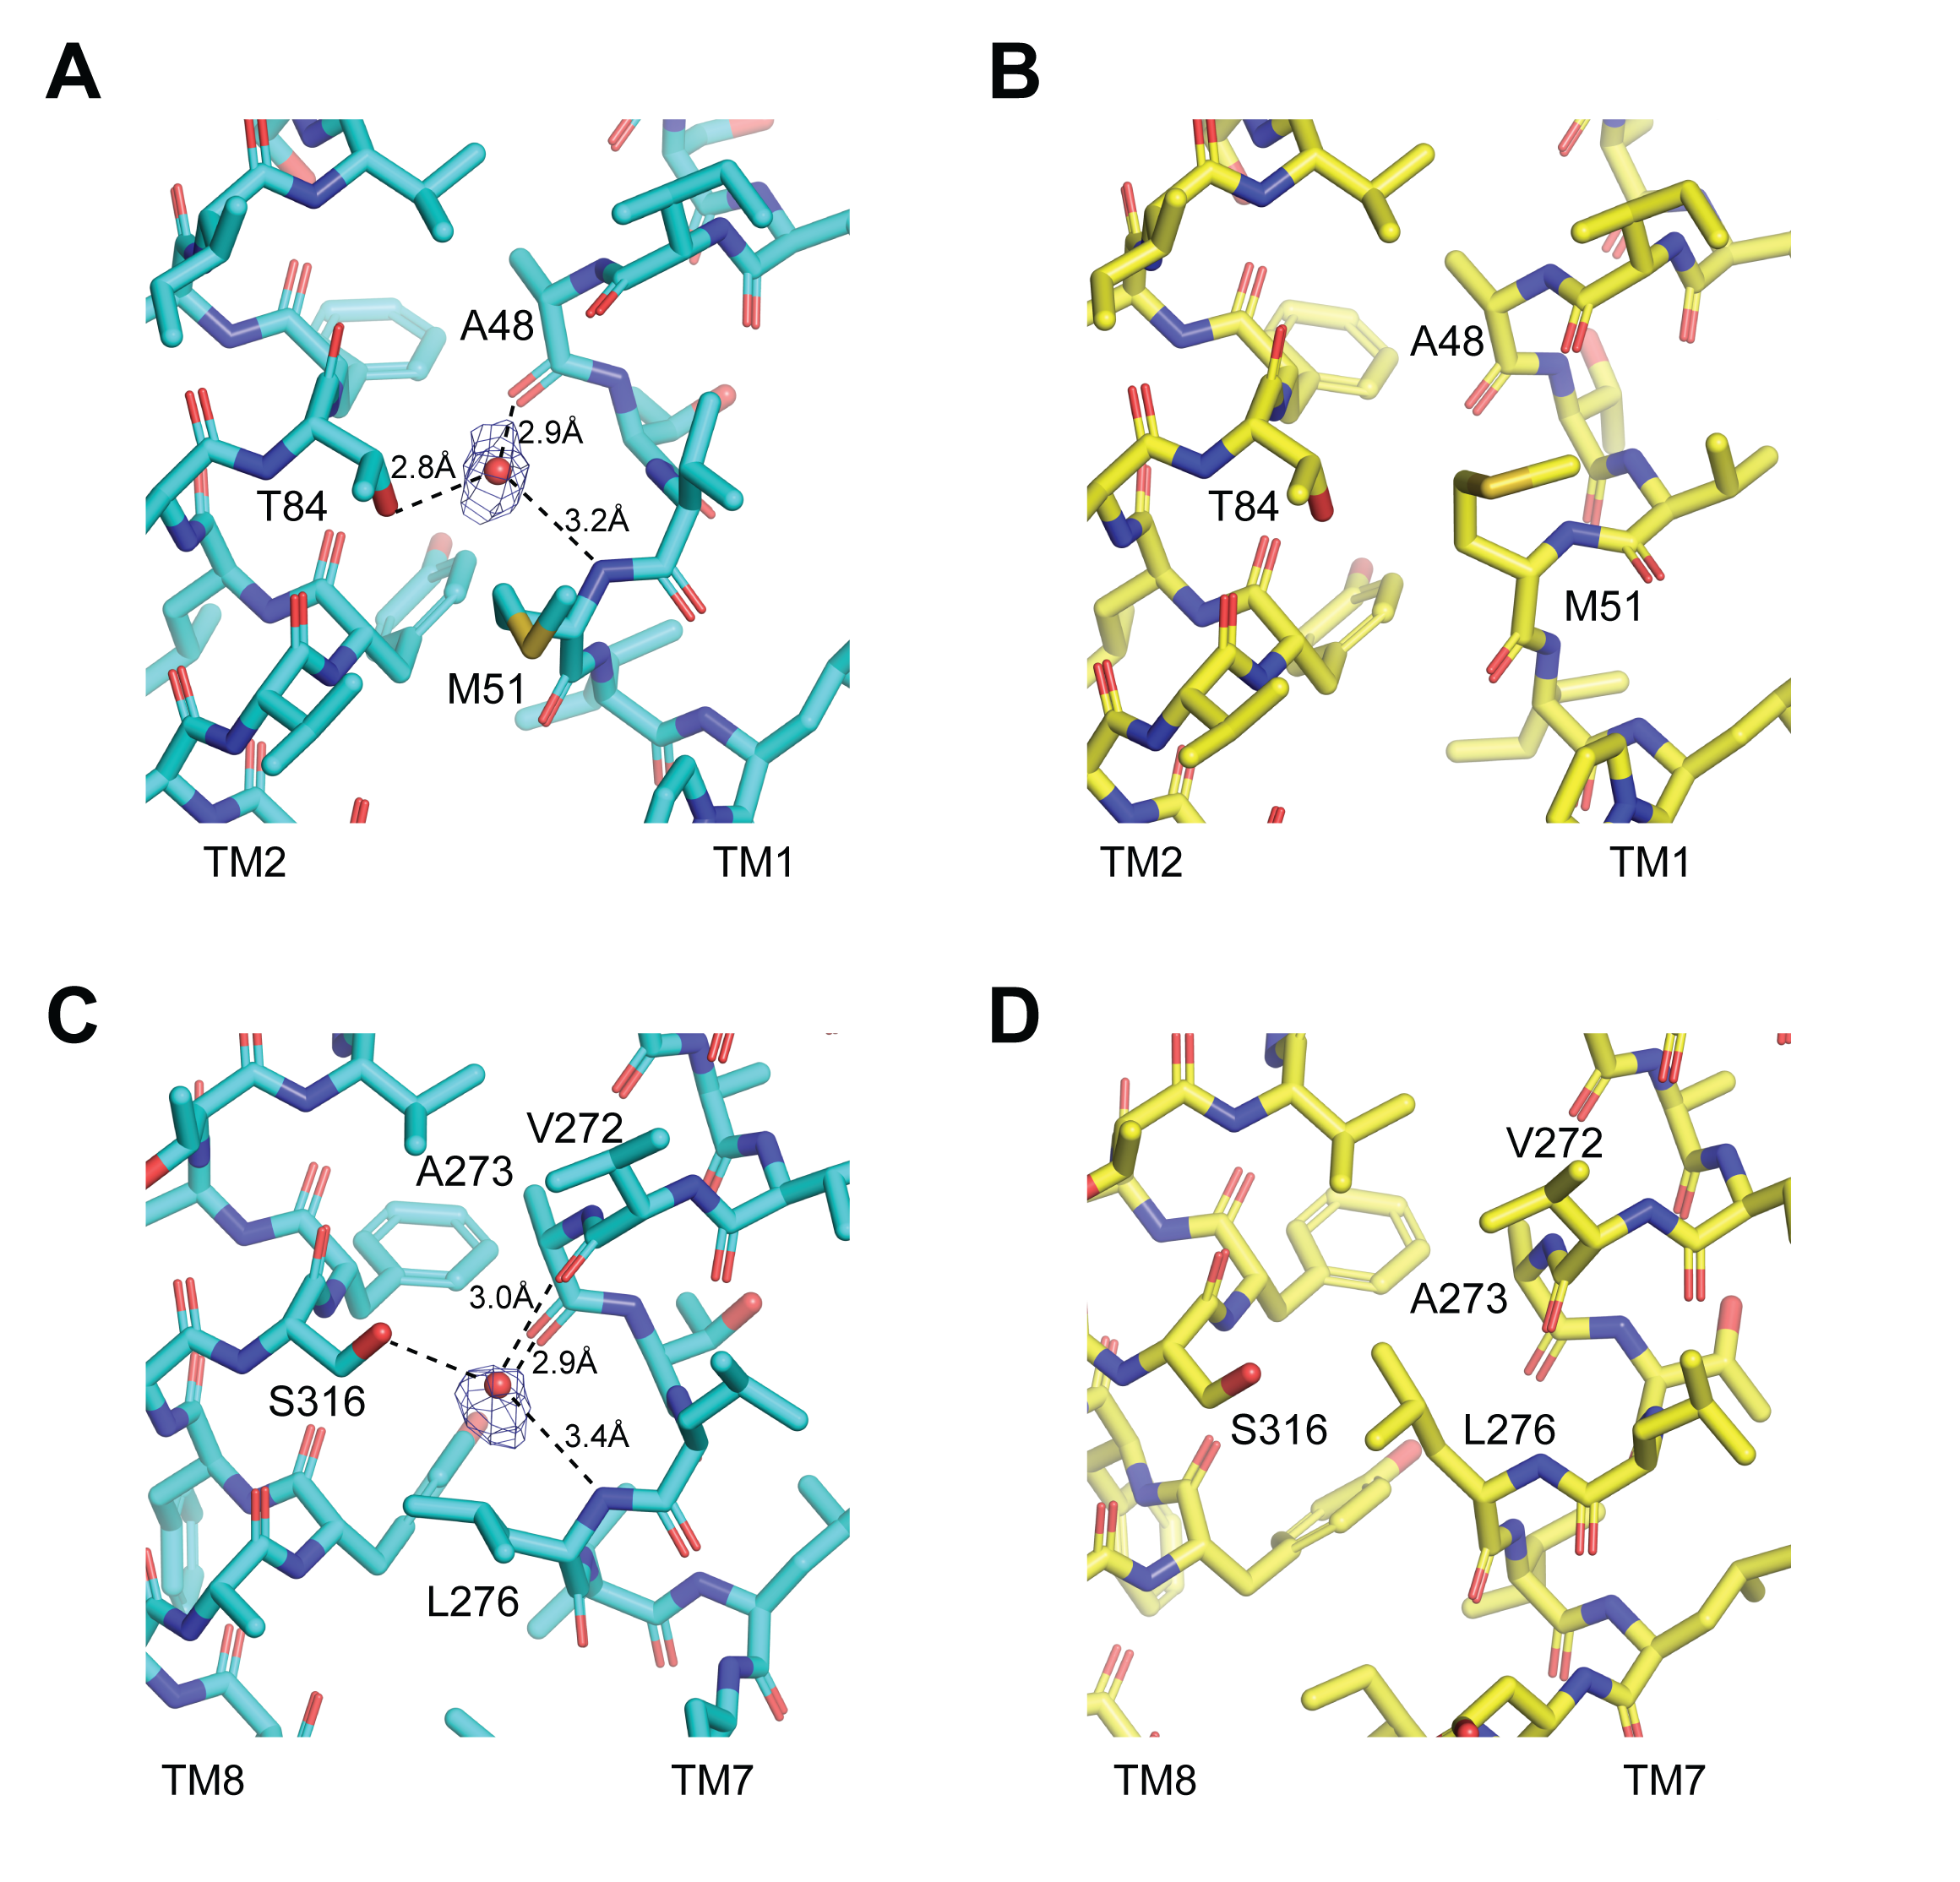

Supplement: supp [file elife-53430-supp-v1.zip › elife_poa_e53430_Figure_4_figure_supplement_1.png]

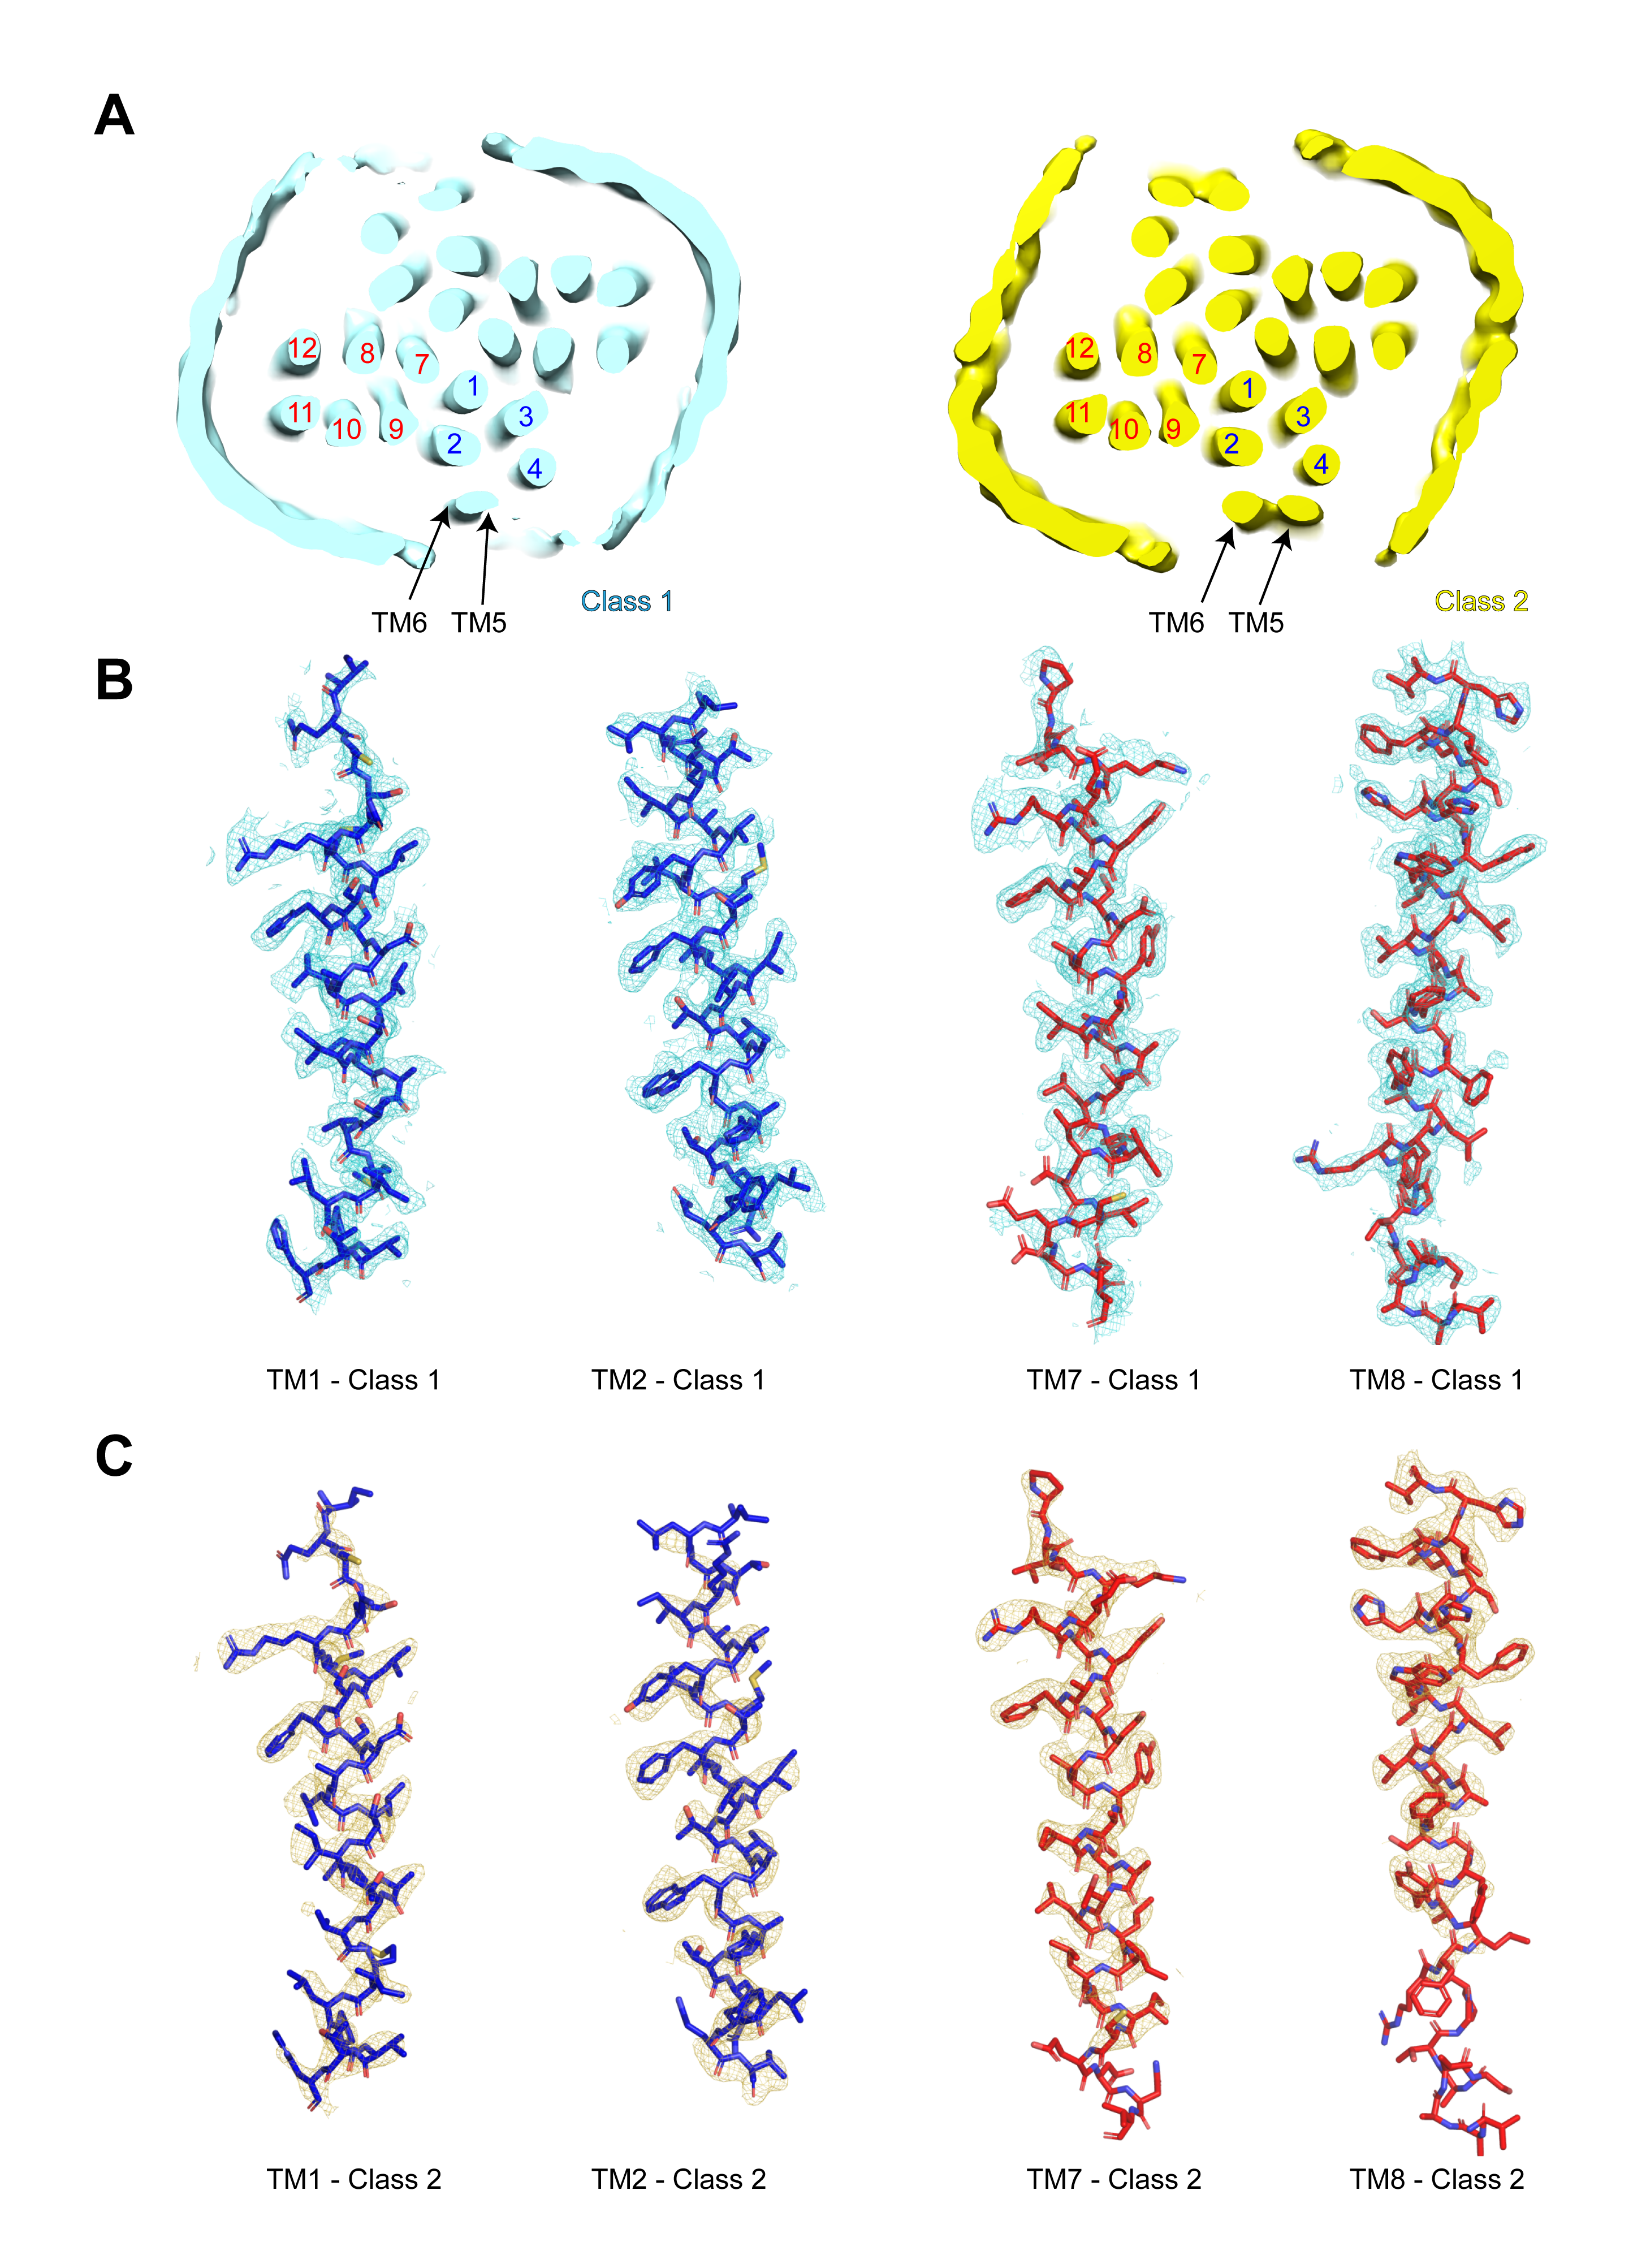

Supplement: supp [file elife-53430-supp-v1.zip › elife_poa_e53430_Figure_2_figure_supplement_2.png]

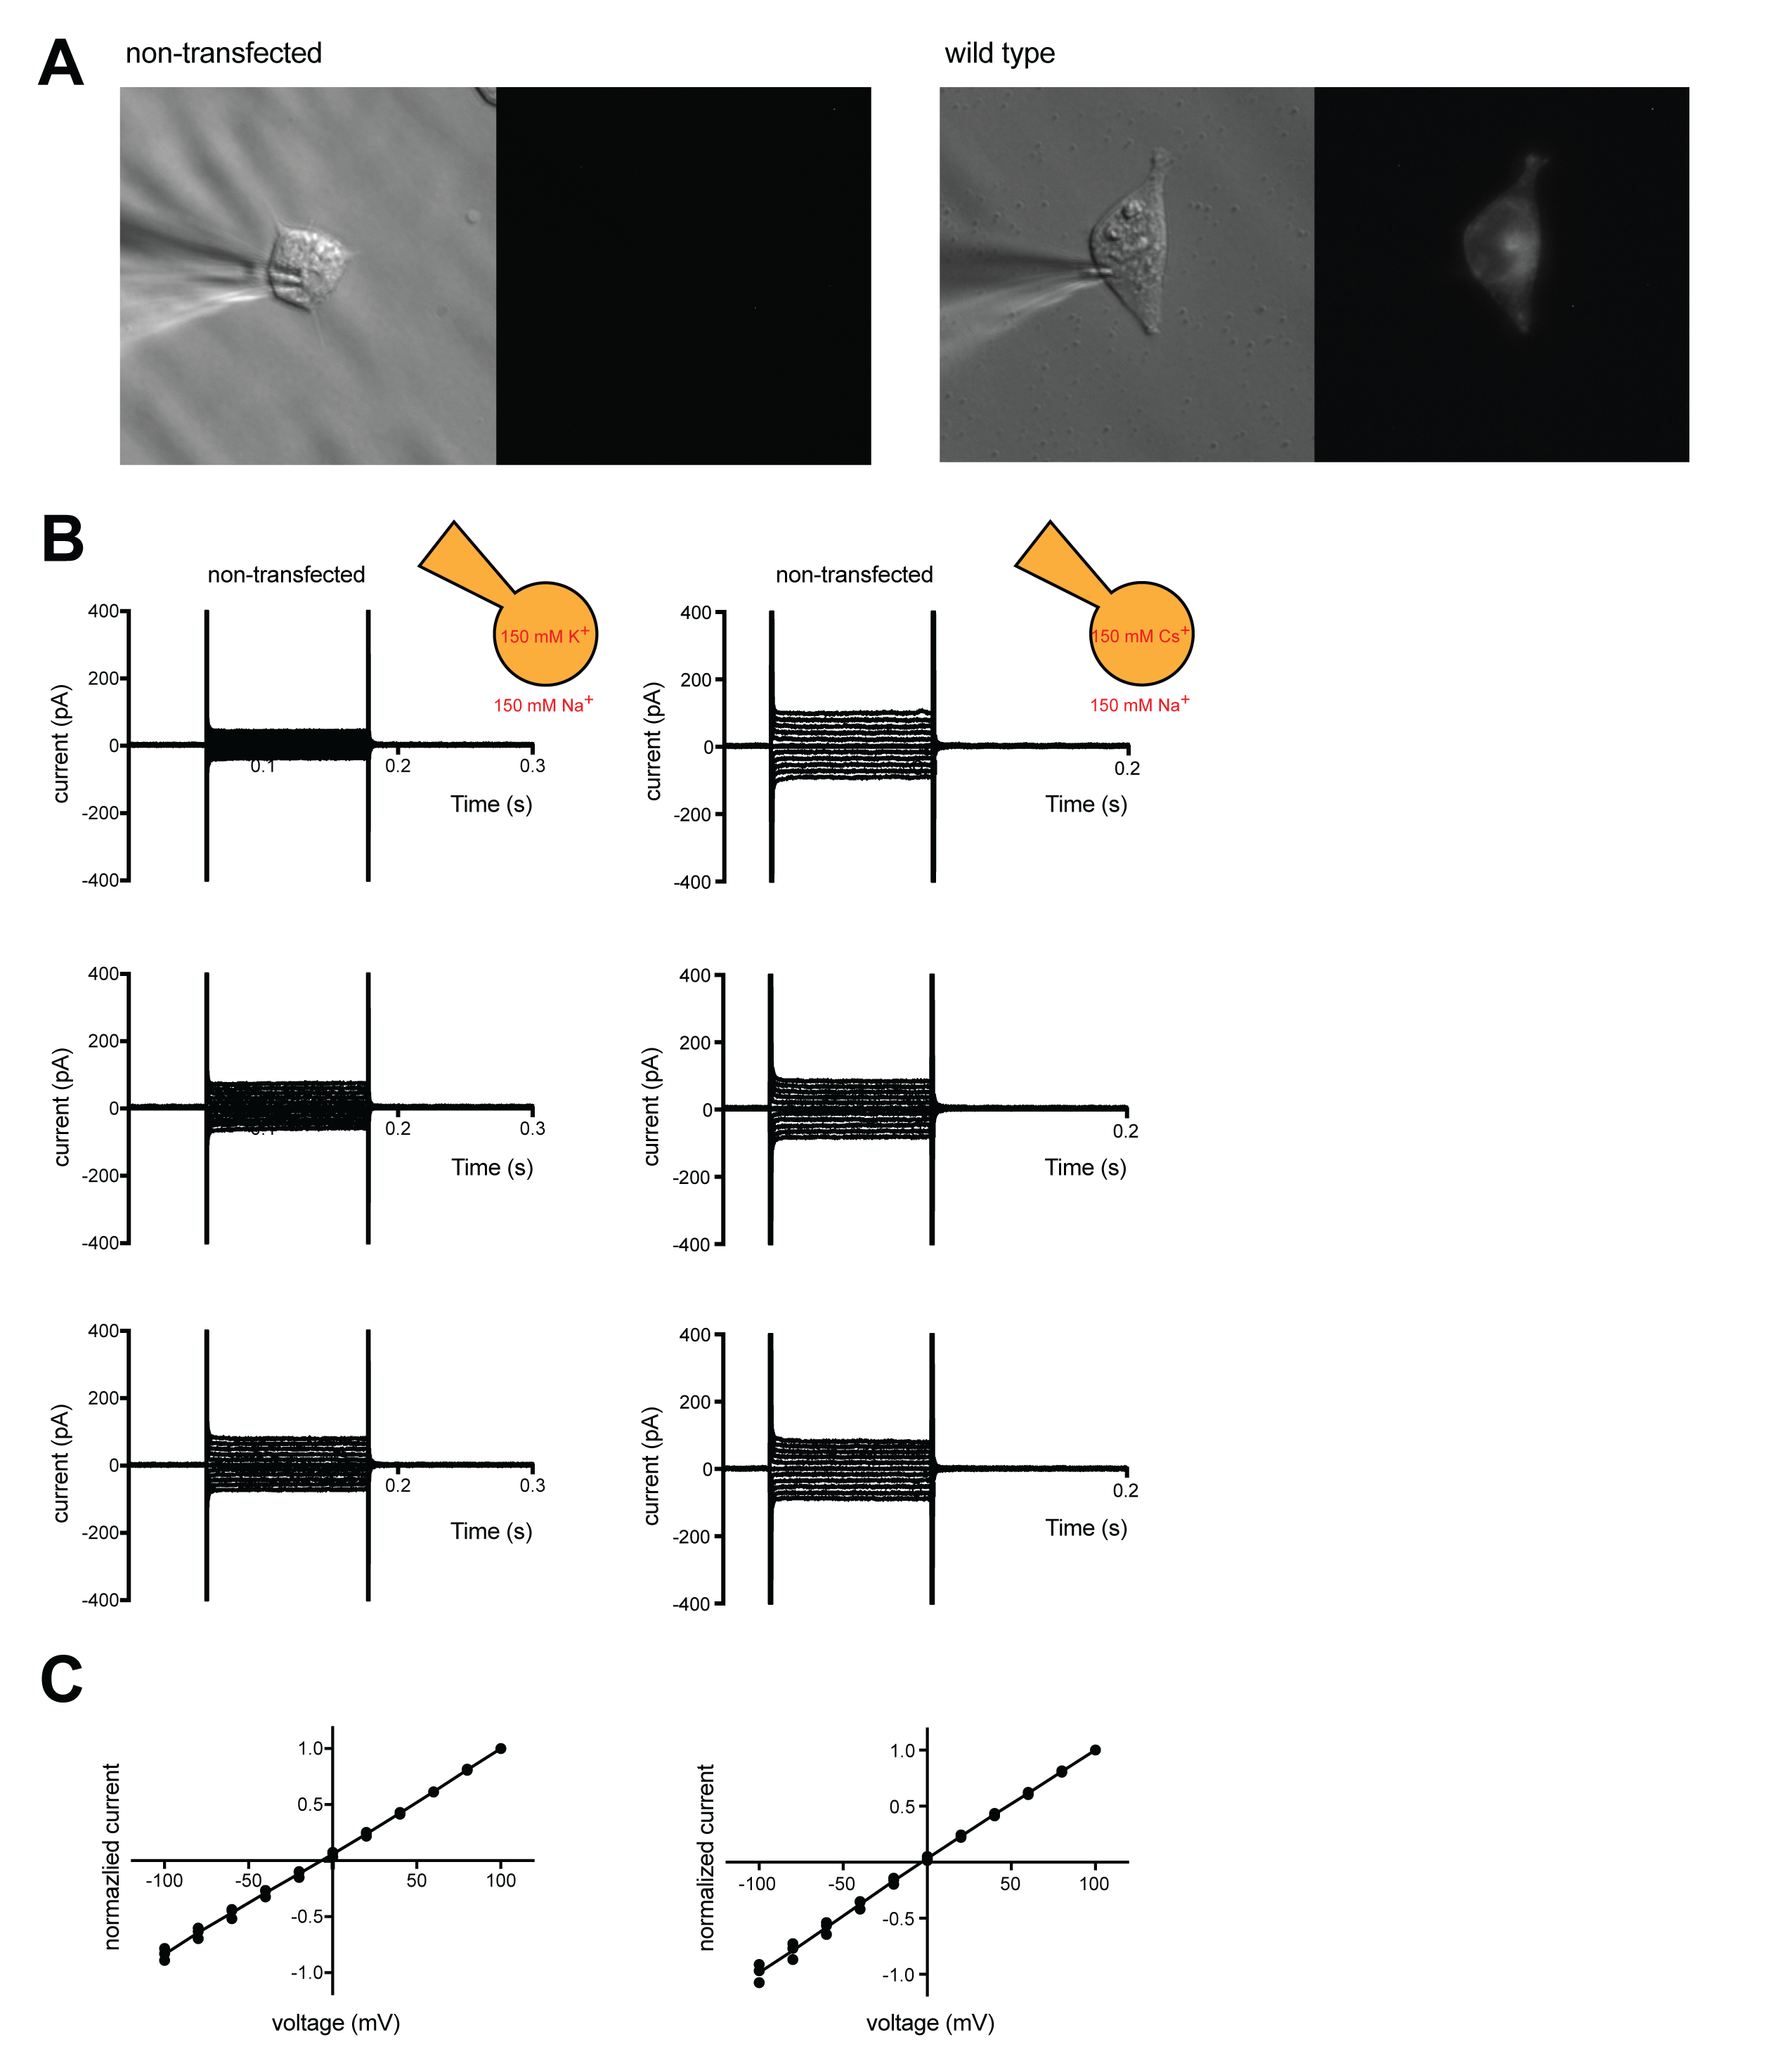

Supplement: supp [file elife-53430-supp-v1.zip › elife_poa_e53430_Figure_1_figure_supplement_1.png]

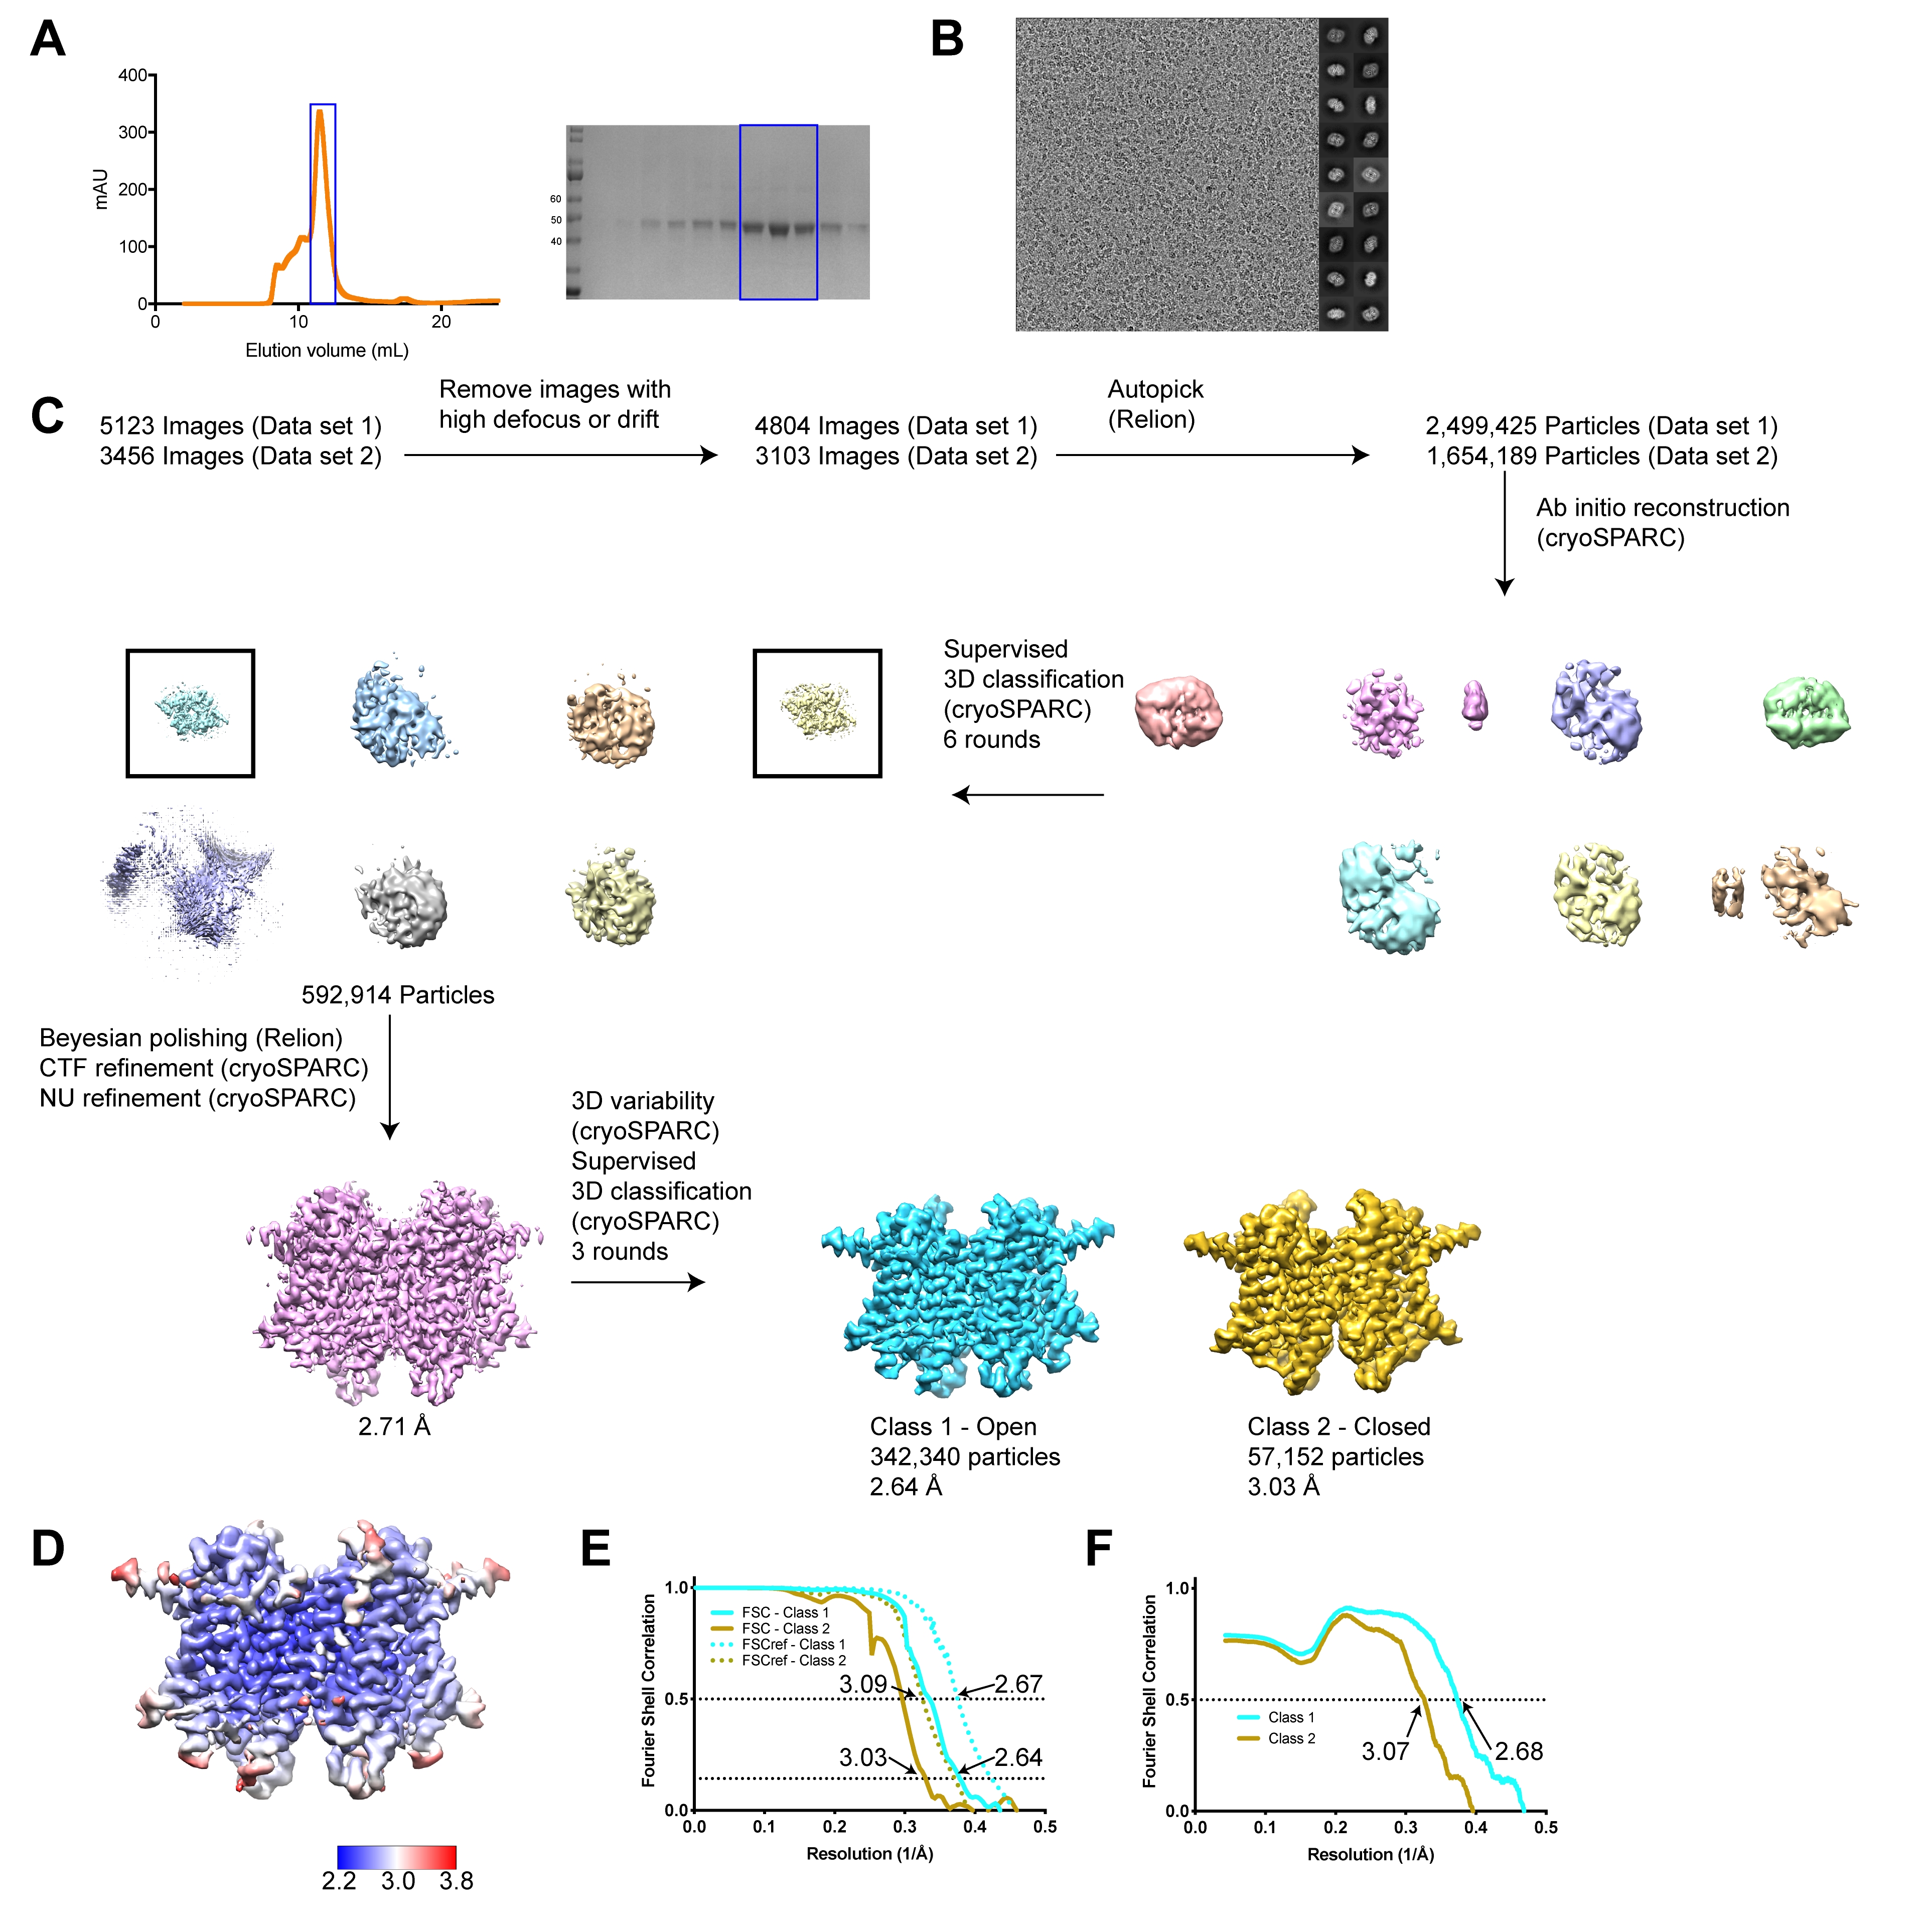

Supplement: supp [file elife-53430-supp-v1.zip › elife_poa_e53430_Figure_2_figure_supplement_1.png]

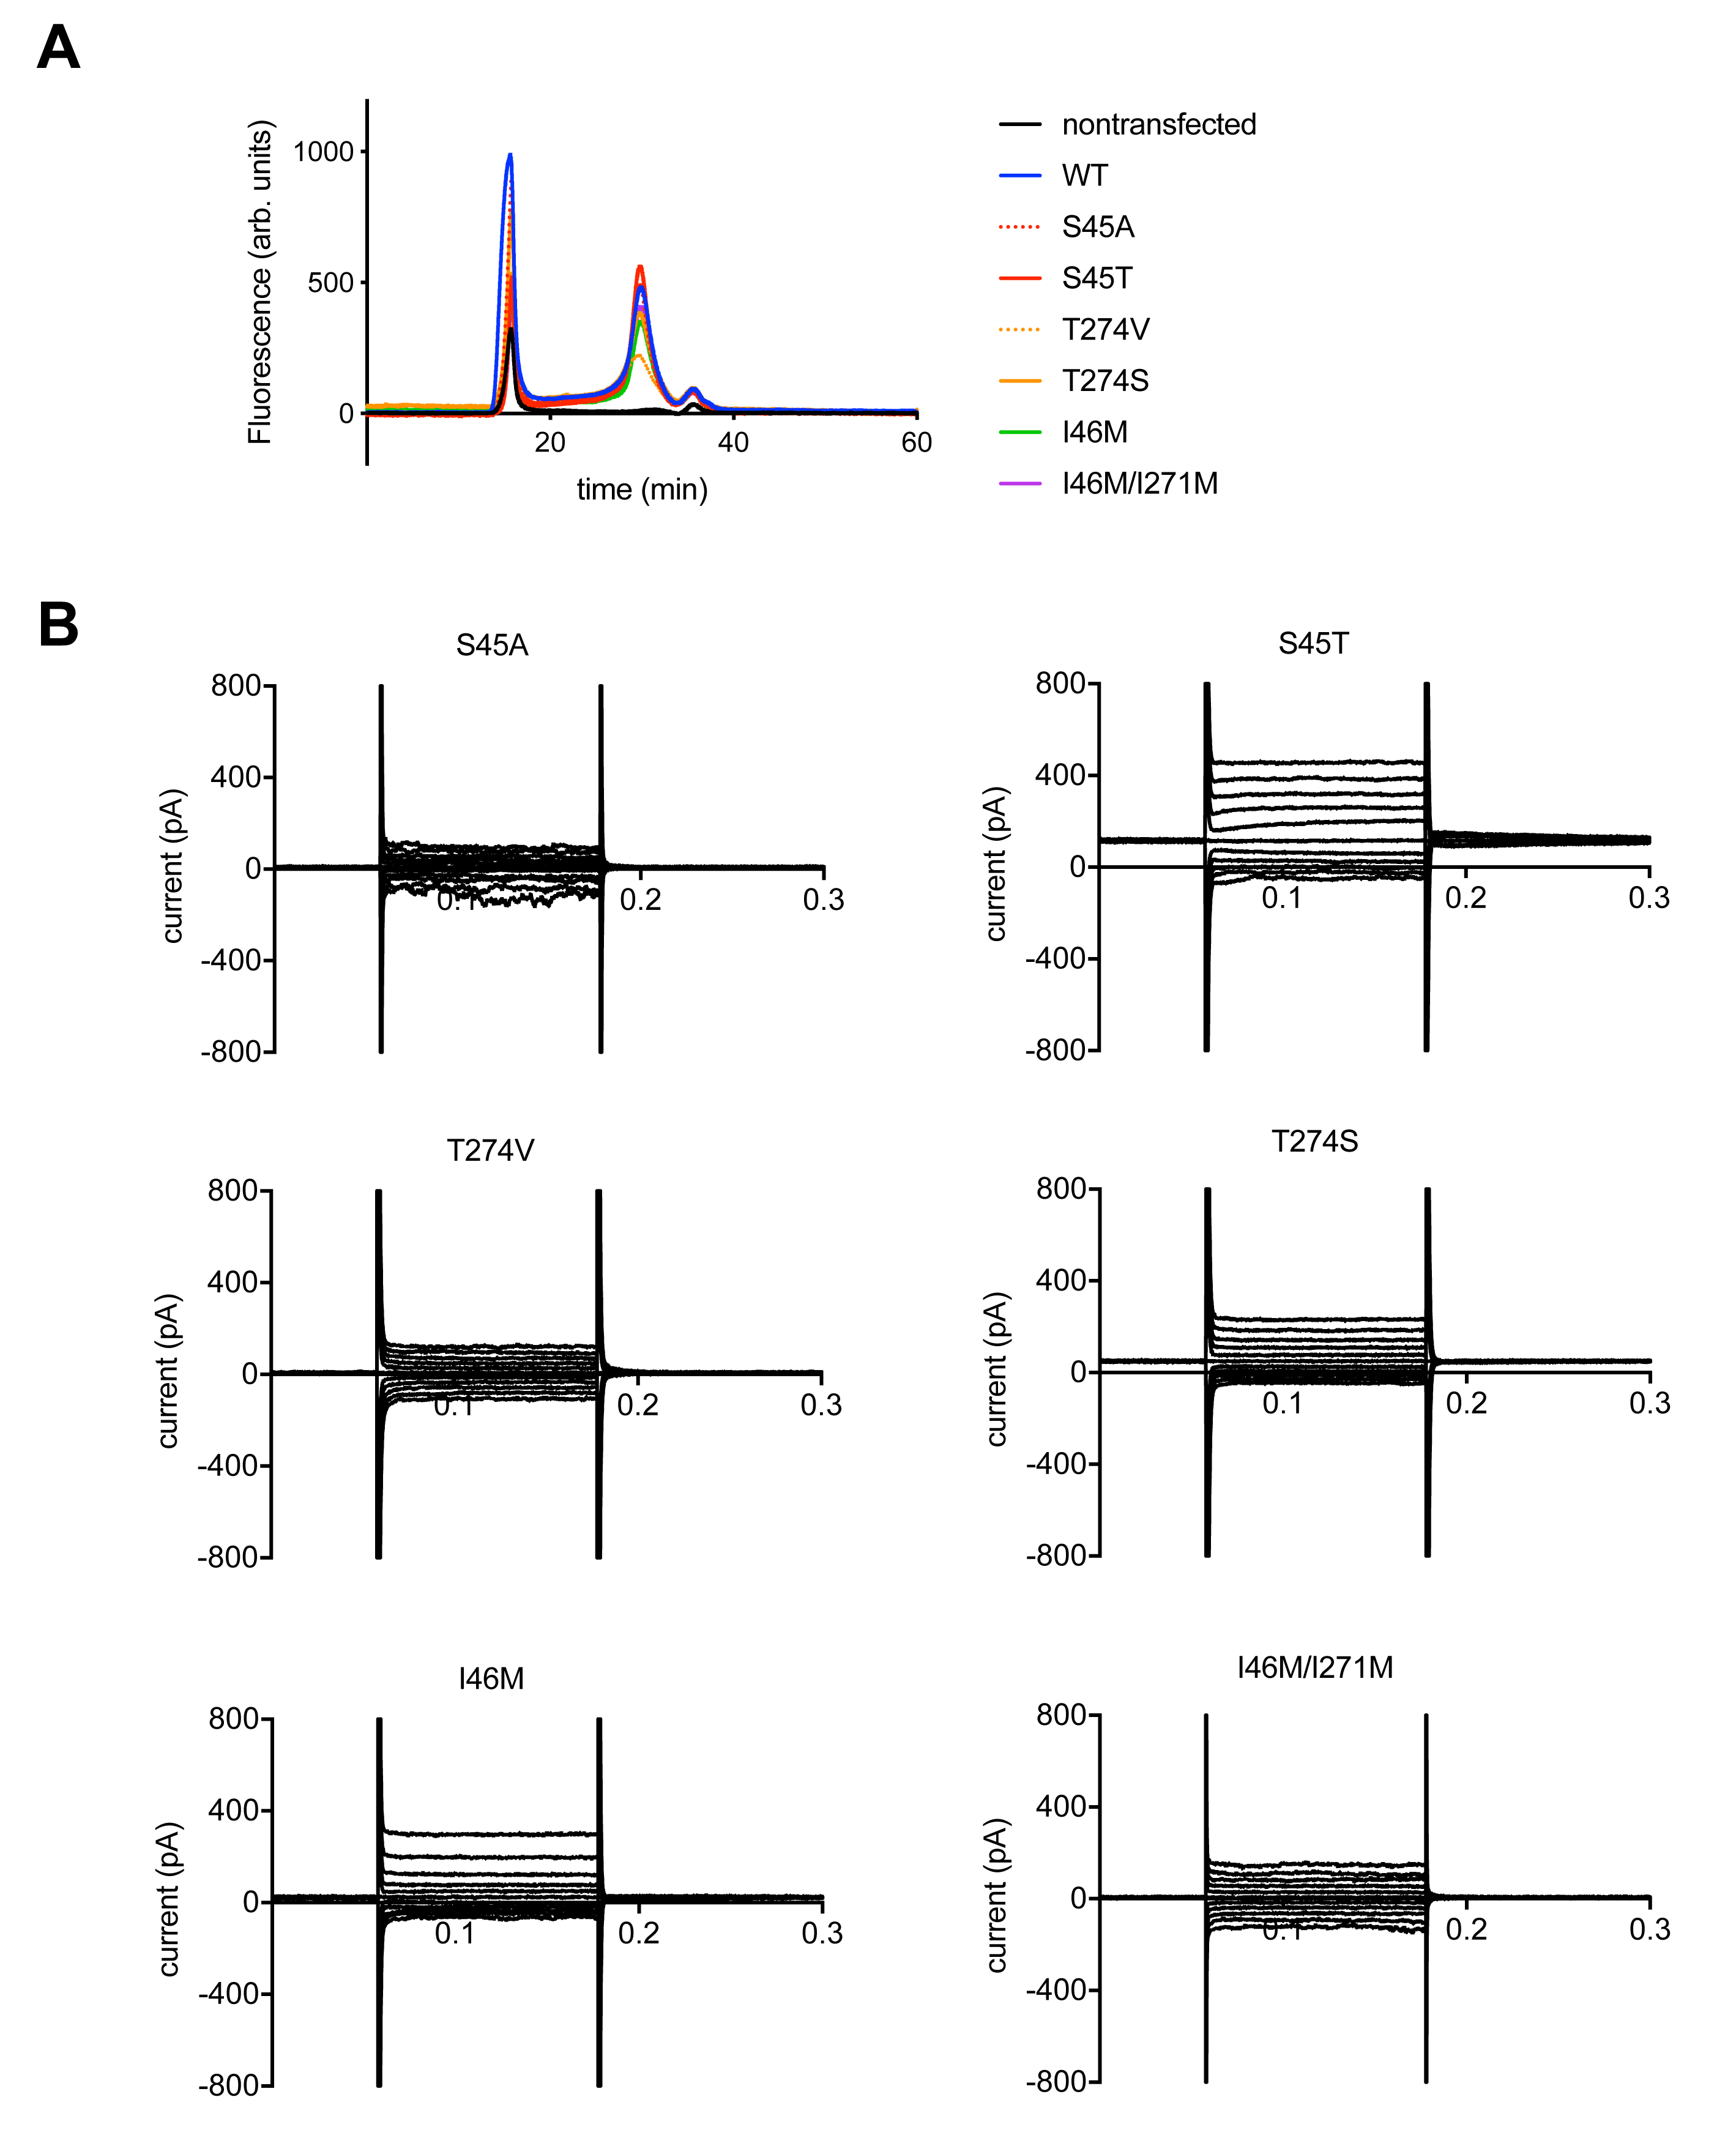

Supplement: supp [file elife-53430-supp-v1.zip › elife_poa_e53430_Figure_6_figure_supplement_1.png]
